# Supplementary material for: Amphiphilic cyclodextrin derivatives with antibacterial activity: chemical mutation and structure–activity relationship
Source: Royal Society of Chemistry journal article supplement (doi:10.1039/d4nj01874e), 2024-01-01
Supplement: d4nj01874e1.pdf [file d4nj01874e1.pdf]

## Electronic Supporting Information

### Amphiphilic cyclodextrin derivatives with antibacterial activity: chemical mutation and structure-activity relationship

Hatsuo Yamamura,<sup>\*a</sup> Ayame Kato,<sup>a</sup> Eri Yamada,<sup>a</sup> Hisato Kato,<sup>b</sup> Takashi Katsu,<sup>b</sup> Kazufumi Masuda,<sup>b</sup> Kayo Osawa,<sup>c</sup> Atsushi Miyagawa<sup>a</sup>

<sup>a</sup> Graduate School of Engineering, Nagoya Institute of Technology, Gokiso-cho, Showa-ku, Nagoya 466-8555, Japan

<sup>b</sup> Graduate School of Clinical Pharmacy, Shujitsu University, 1-6-1 Nishigawara, Naka-ku, Okayama-shi, Okayama 703-8516, Japan

<sup>c</sup> Division of Health Science, Department of Medical Technology, Kobe Tokiwa University, Kobe 653-0838, Japan

#### Index

|                     |    |
|---------------------|----|
| 1. NMR spectra..... | 2  |
| 2. References.....  | 18 |

## 1. NMR spectra

1.1  $^1\text{H}$  NMR (400 MHz,  $\text{CDCl}_3$ ) spectrum of azido methyl ether **9**.<sup>1</sup>

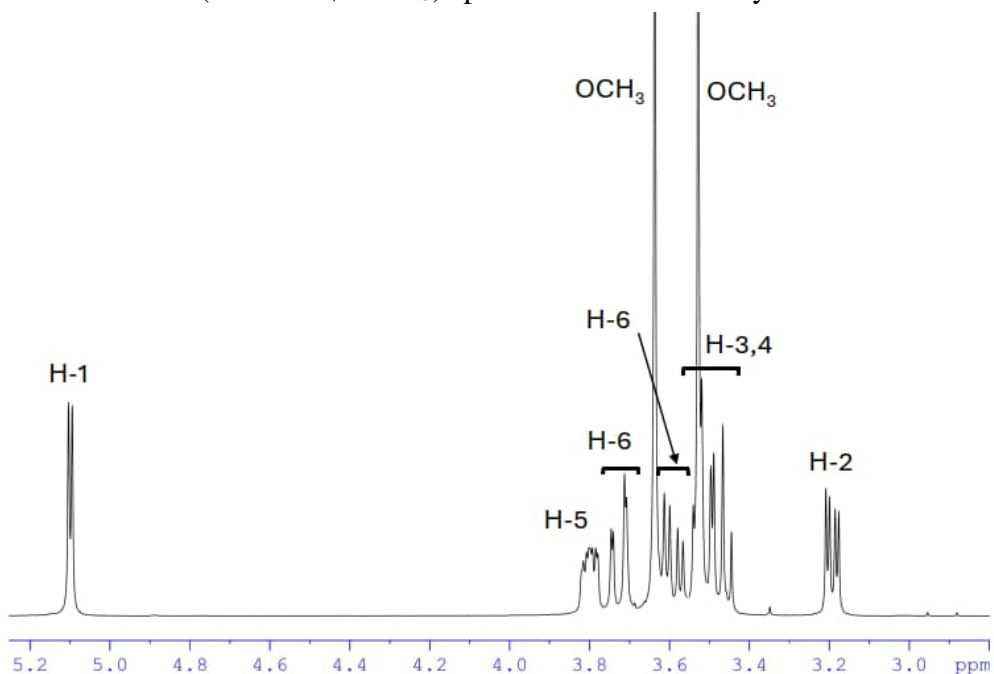

1.2  $^1\text{H}$  NMR (400 MHz,  $\text{CDCl}_3$ ) spectrum of azido ethyl ether **10**.

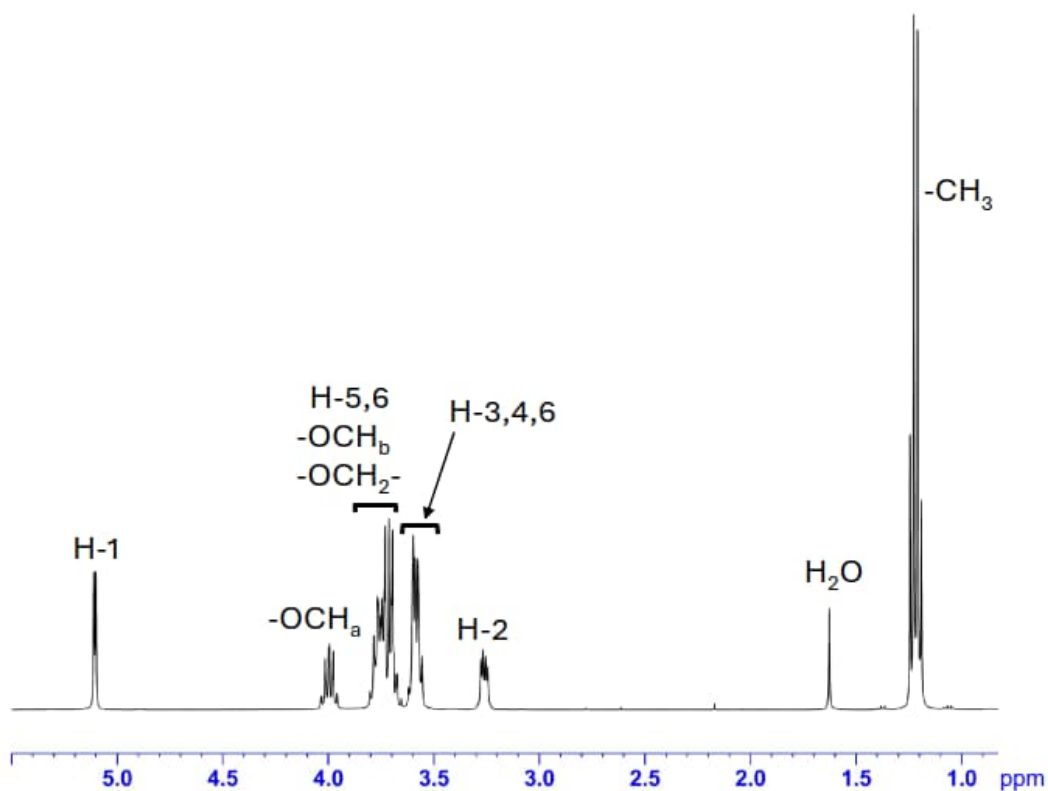

1.3  $^{13}\text{C}$  NMR (100 MHz,  $\text{CDCl}_3$ ) spectrum of azido ethyl ether **10**.

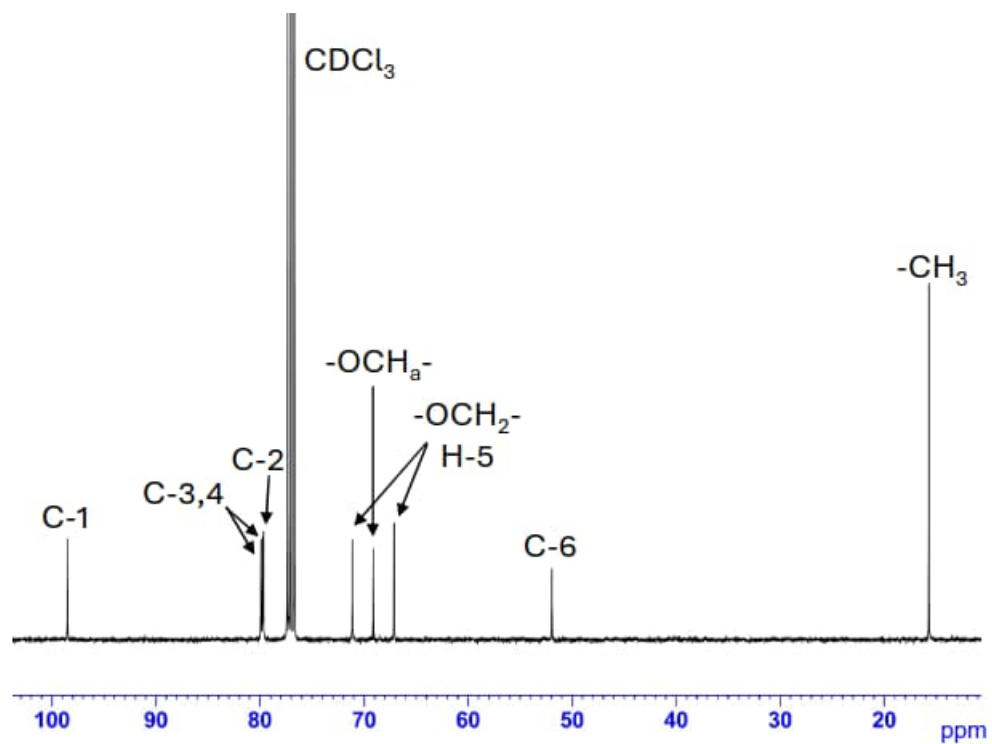

1.4  $^1\text{H}$  NMR (400 MHz,  $\text{CDCl}_3$ ) spectrum of azido propyl ether **11**.

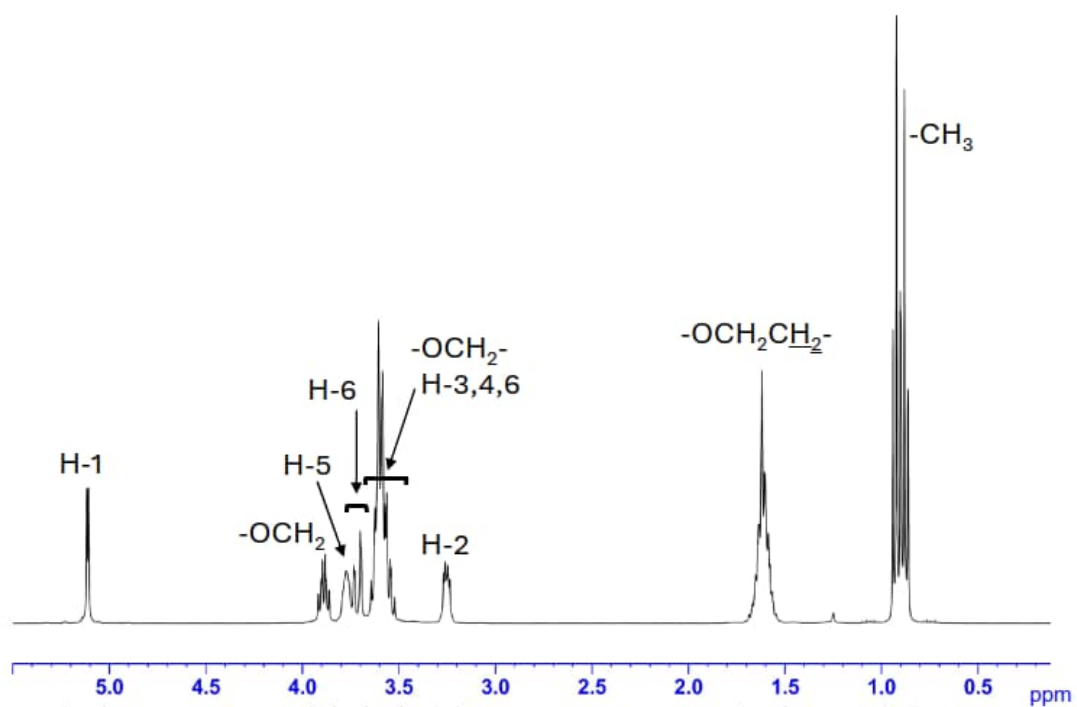

1.5  $^{13}\text{C}$  NMR (100 MHz,  $\text{CDCl}_3$ ) spectrum of azido propyl ether **11**.

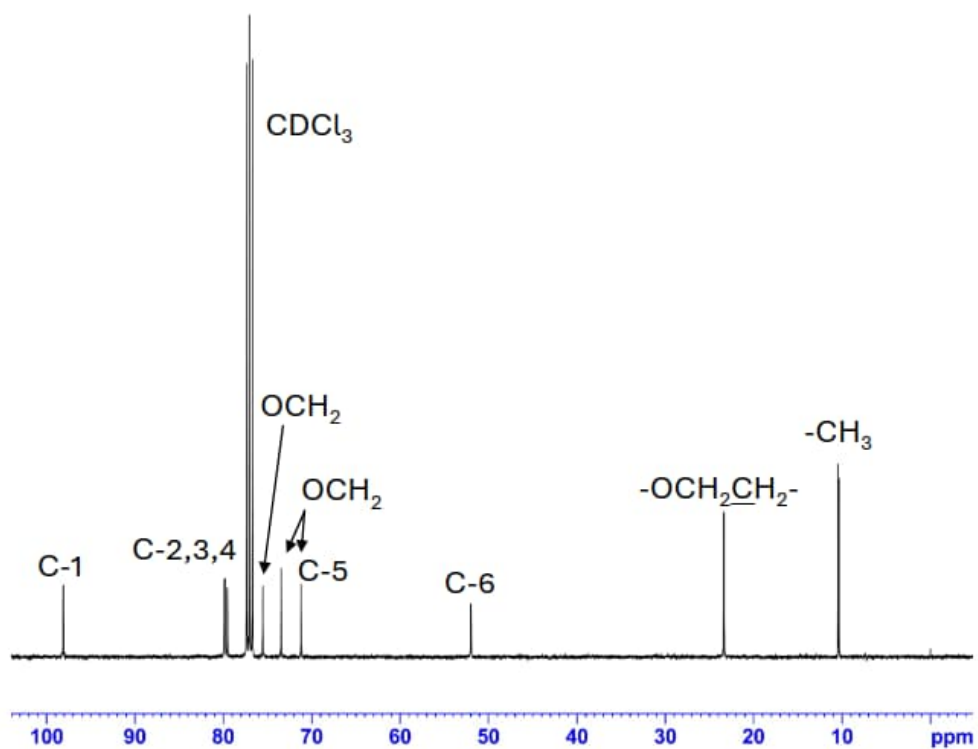

1.6  $^1\text{H}$  NMR (400 MHz,  $\text{CDCl}_3$ ) spectrum of azido butyl ether **12**.

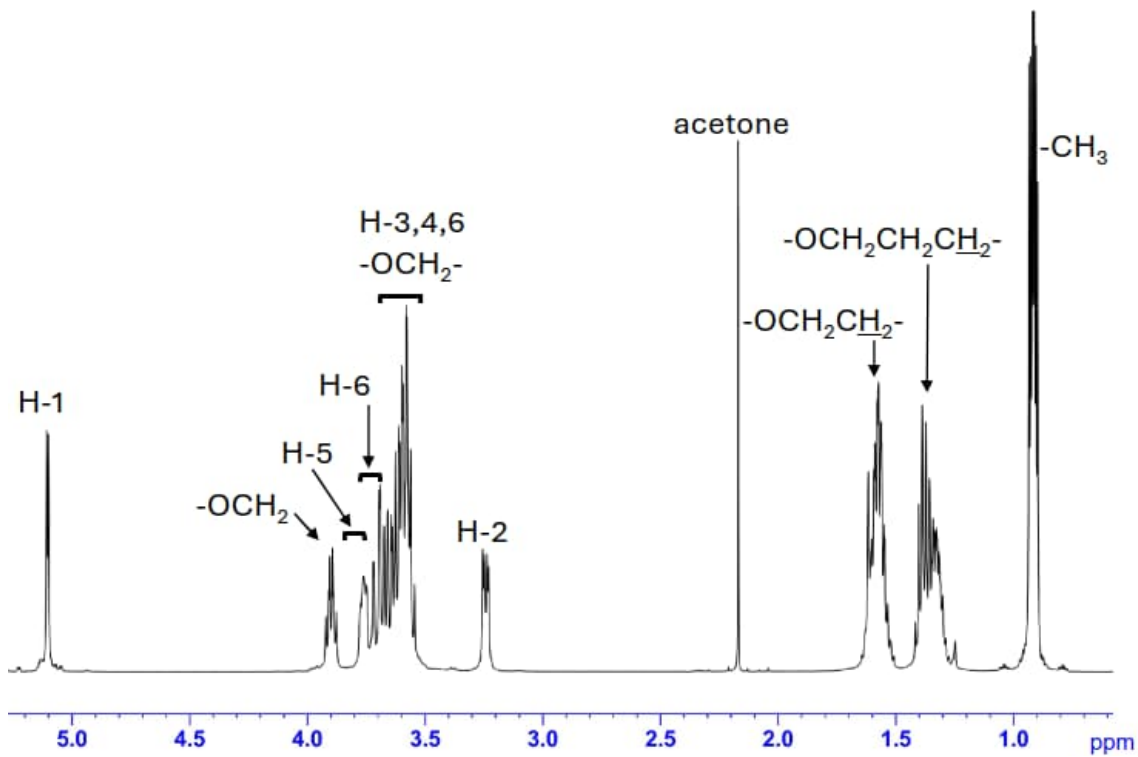

1.7  $^{13}\text{C}$  NMR (100 MHz,  $\text{CDCl}_3$ ) spectrum of azido butyl ether **12**.

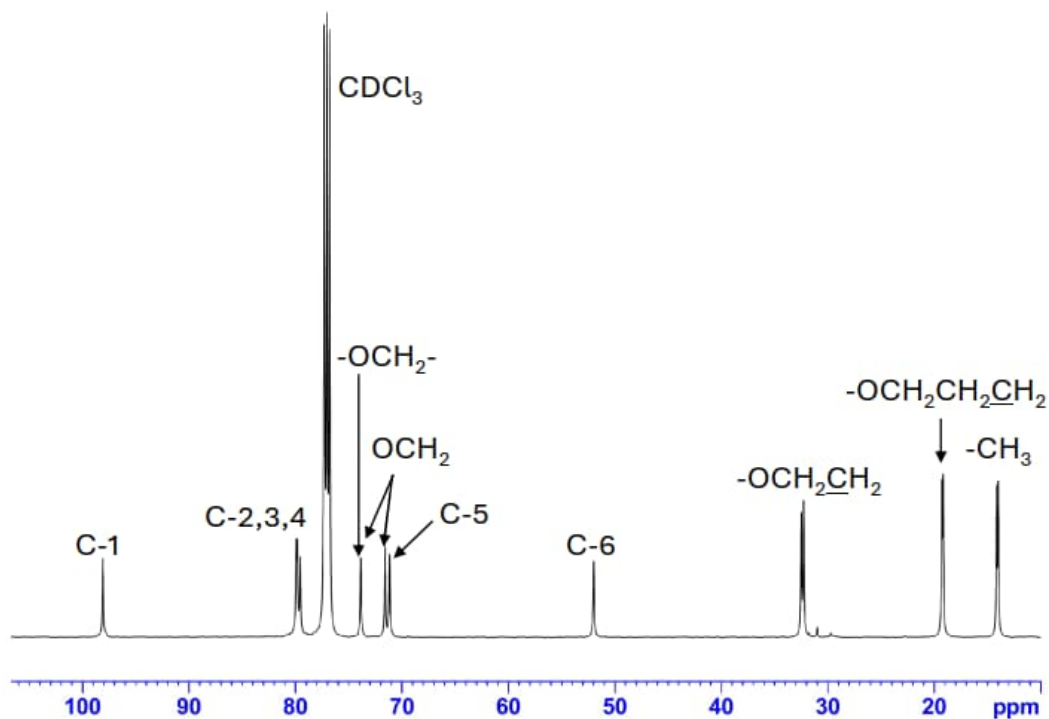

1.8  $^1\text{H}$  NMR (400 MHz,  $\text{D}_2\text{O}$ ) spectrum of aminoclick methyl ether **4**.

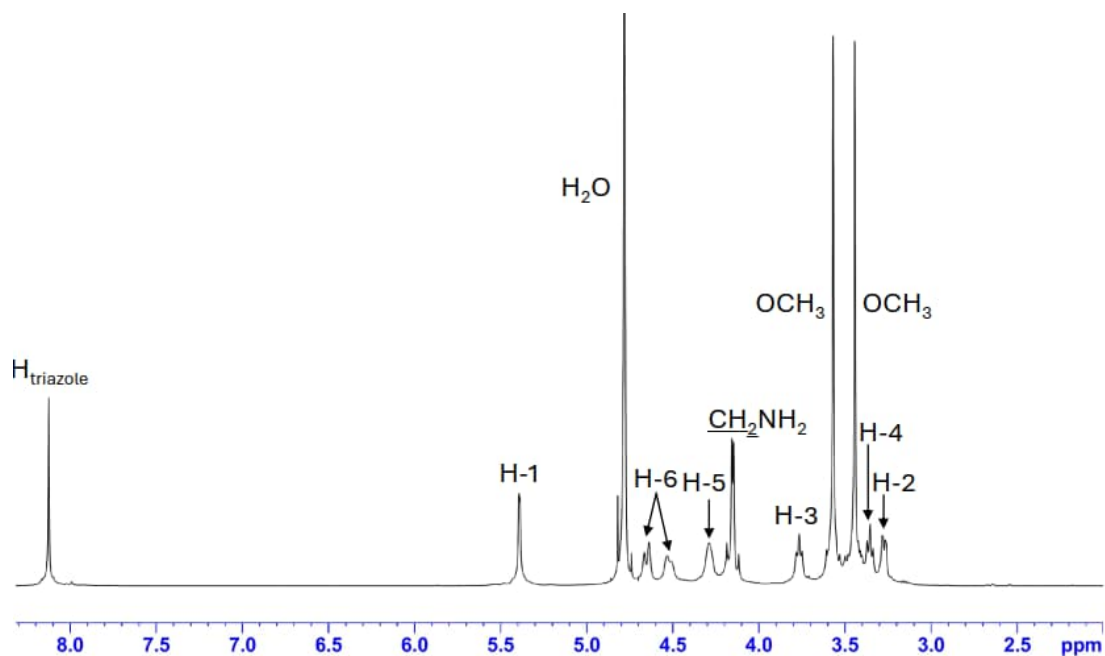

1.9 COSY (400 MHz, D<sub>2</sub>O) spectrum of aminoclick methyl ether **4**.

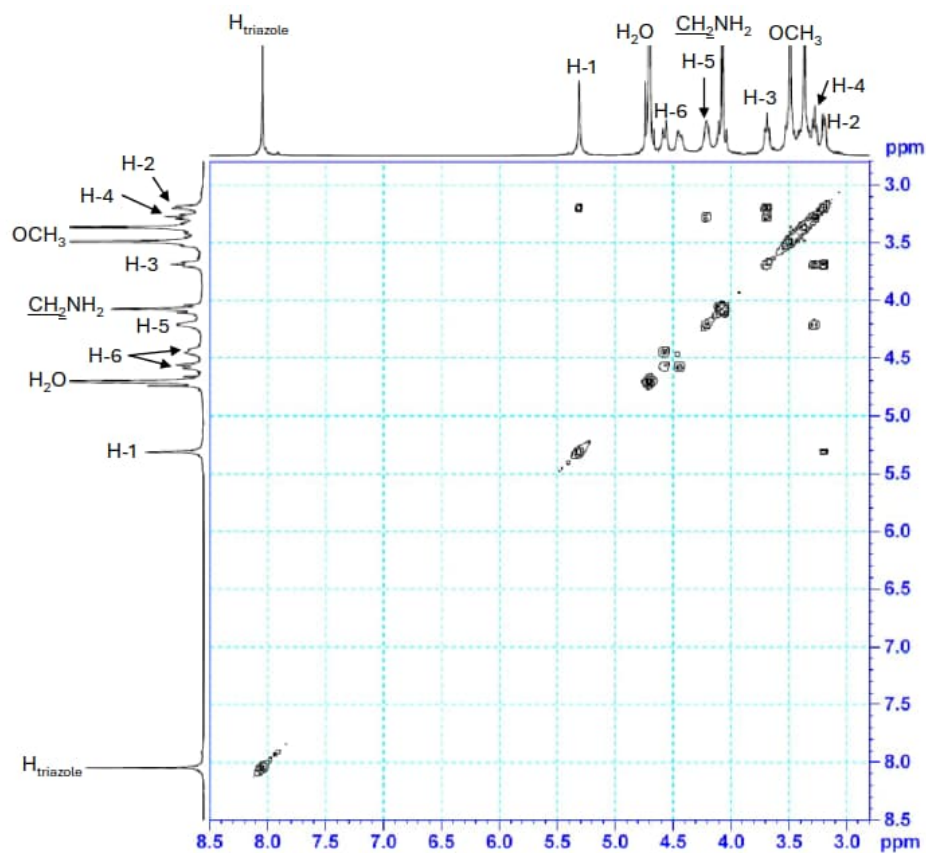

1.10 <sup>13</sup>C NMR (125 MHz, D<sub>2</sub>O) spectrum of aminoclick methyl ether **4**.

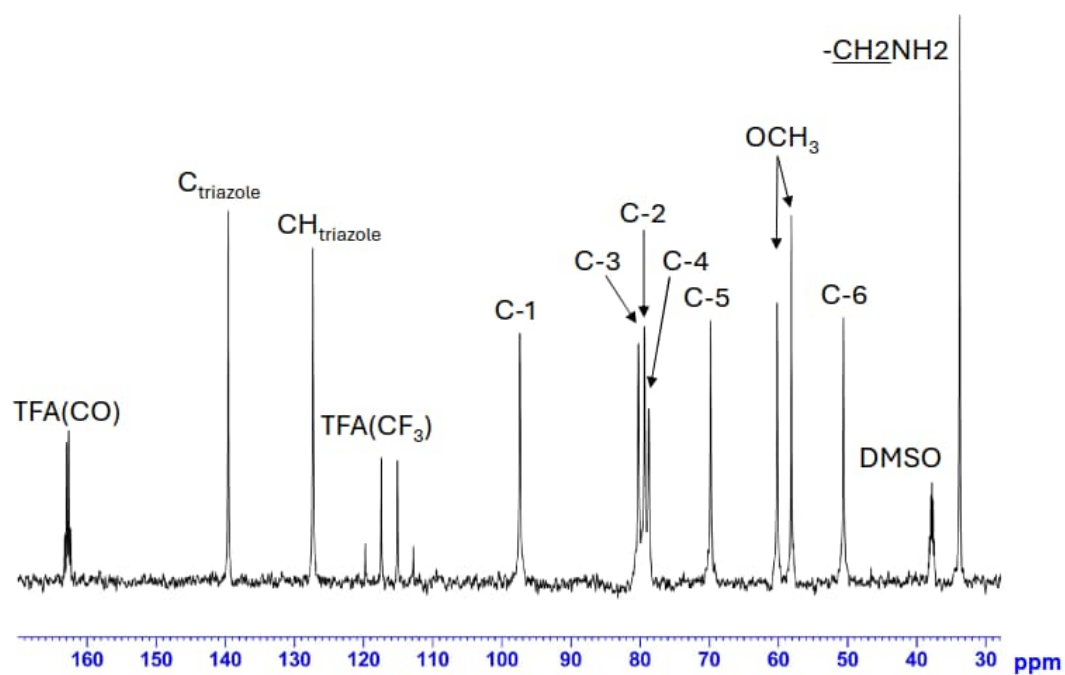

1.11 HMQC (500 MHz, D<sub>2</sub>O) spectrum of aminoclick methyl ether **4**.

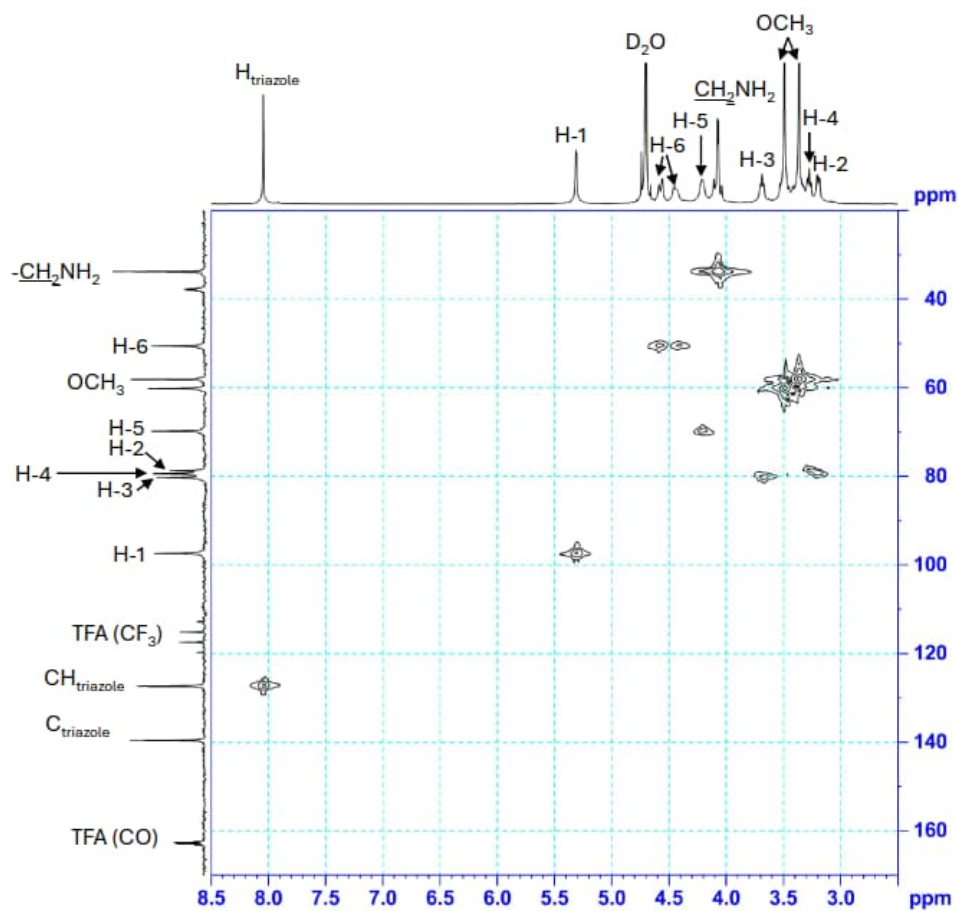

1.12 <sup>1</sup>H NMR (500 MHz, DMSO-*d*<sub>6</sub>) spectrum of aminoclick ethyl ether **5**.

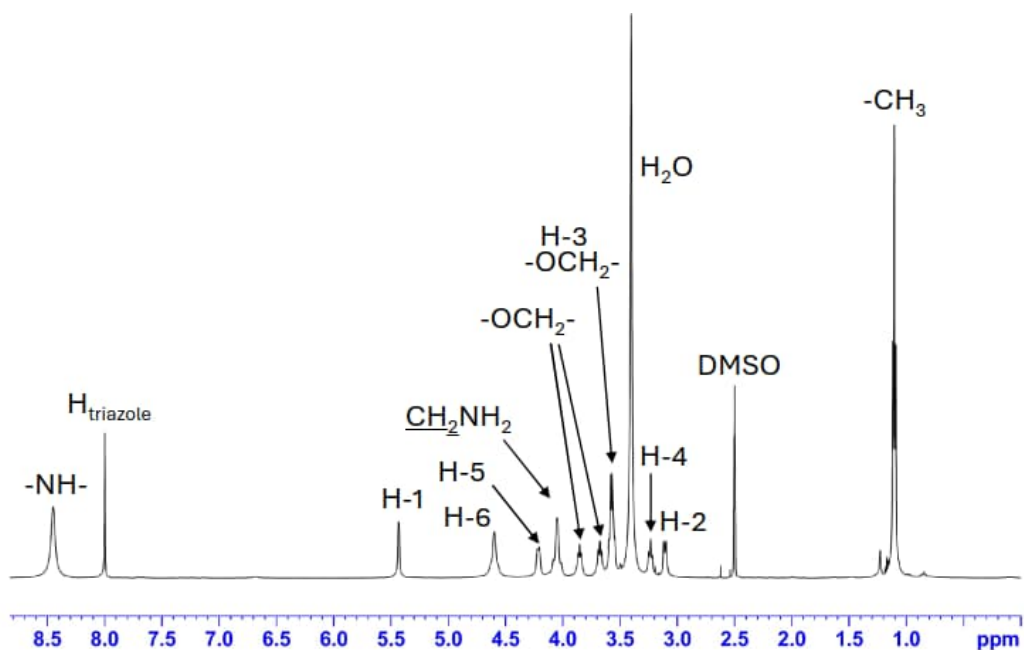

1.13 COSY (500 MHz, DMSO-*d*<sub>6</sub>) spectrum of aminoclick ethyl ether **5**.

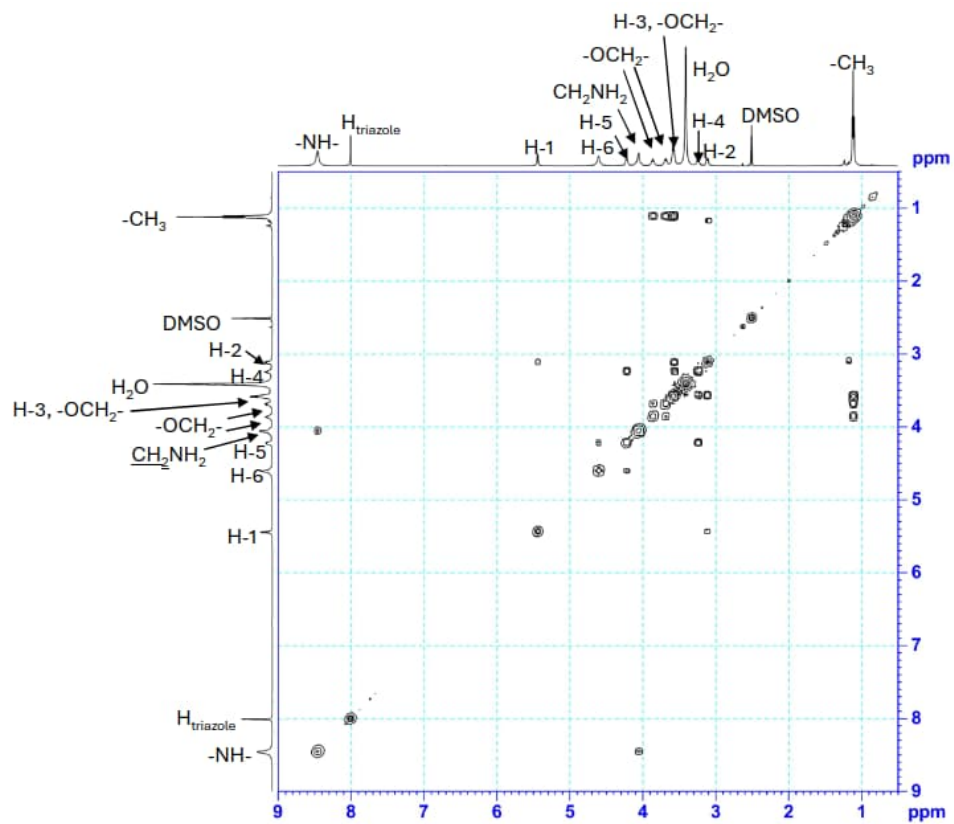

1.14 <sup>13</sup>C NMR (125 MHz, DMSO-*d*<sub>6</sub>) spectrum of aminoclick ethyl ether **5**.

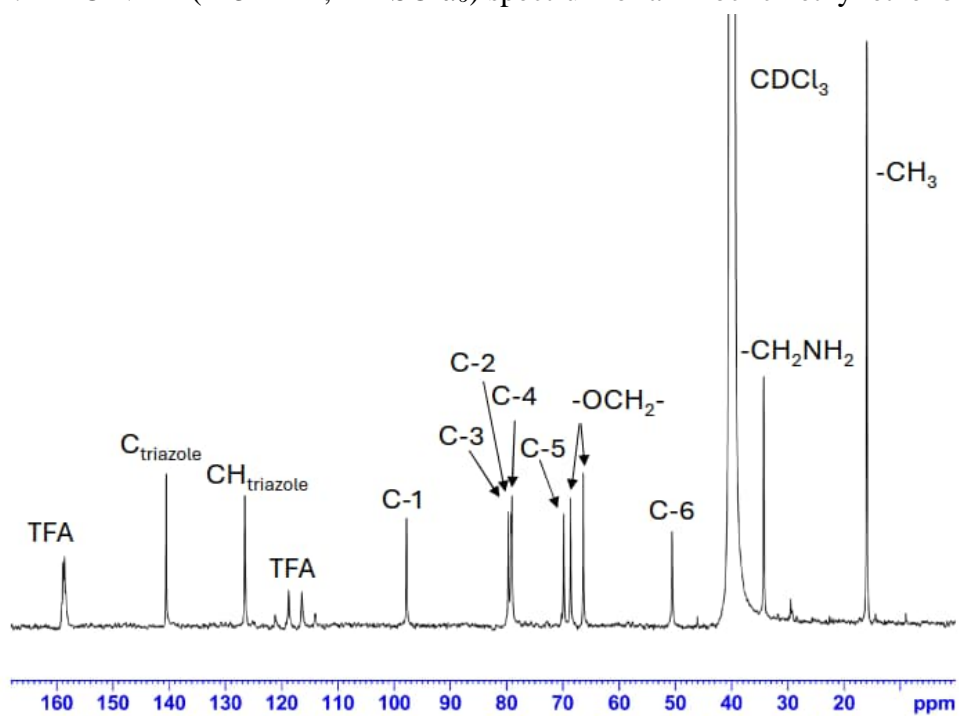



1.15 HMQC (500 MHz, DMSO-*d*<sub>6</sub>) spectrum of aminoclick ethyl ether **5**.

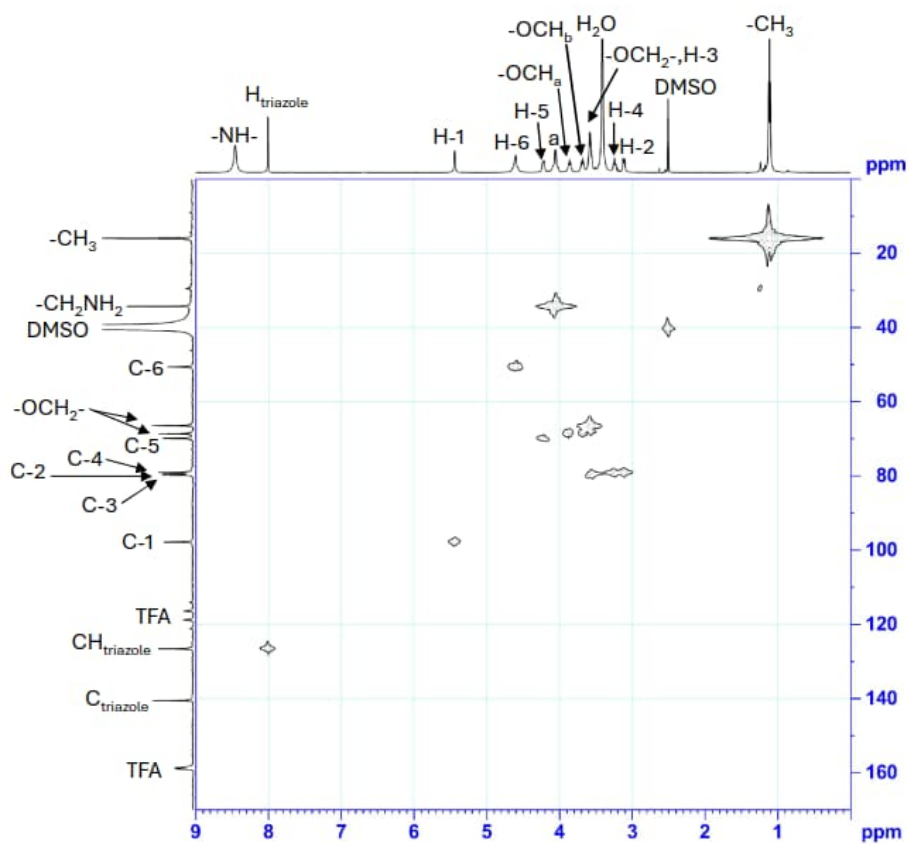

1.16 <sup>1</sup>H NMR (500 MHz, DMSO-*d*<sub>6</sub>) spectrum of aminoclick propyl ether **6**.

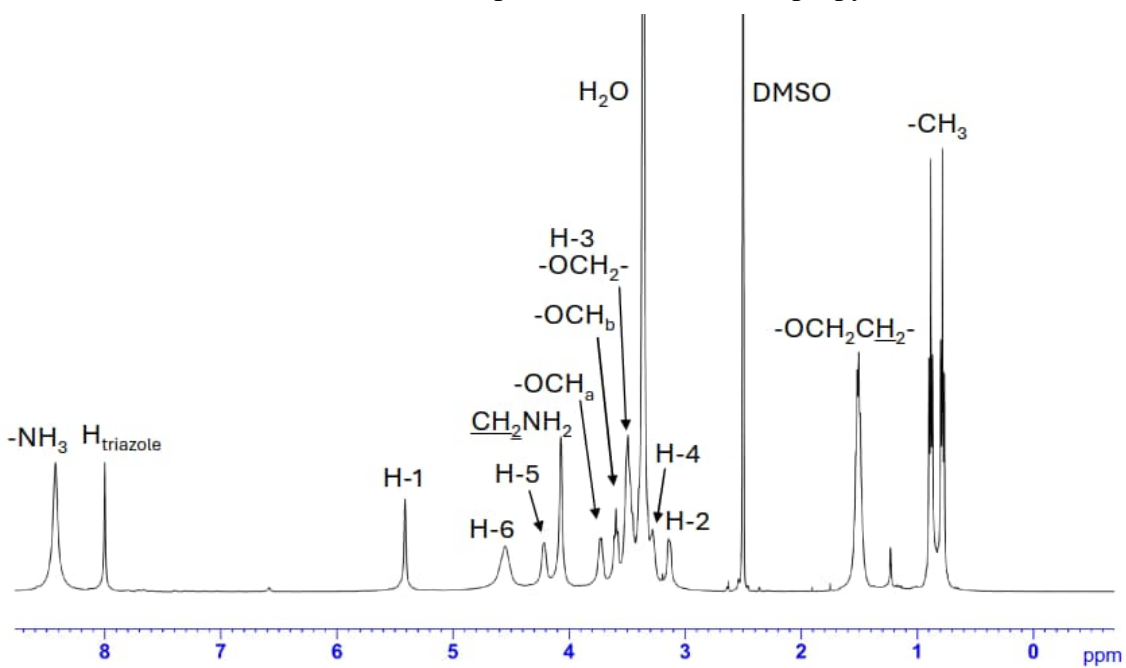



1.19 HMQC (500 MHz, DMSO-*d*<sub>6</sub>) spectrum of aminoclick propyl ether **6**.

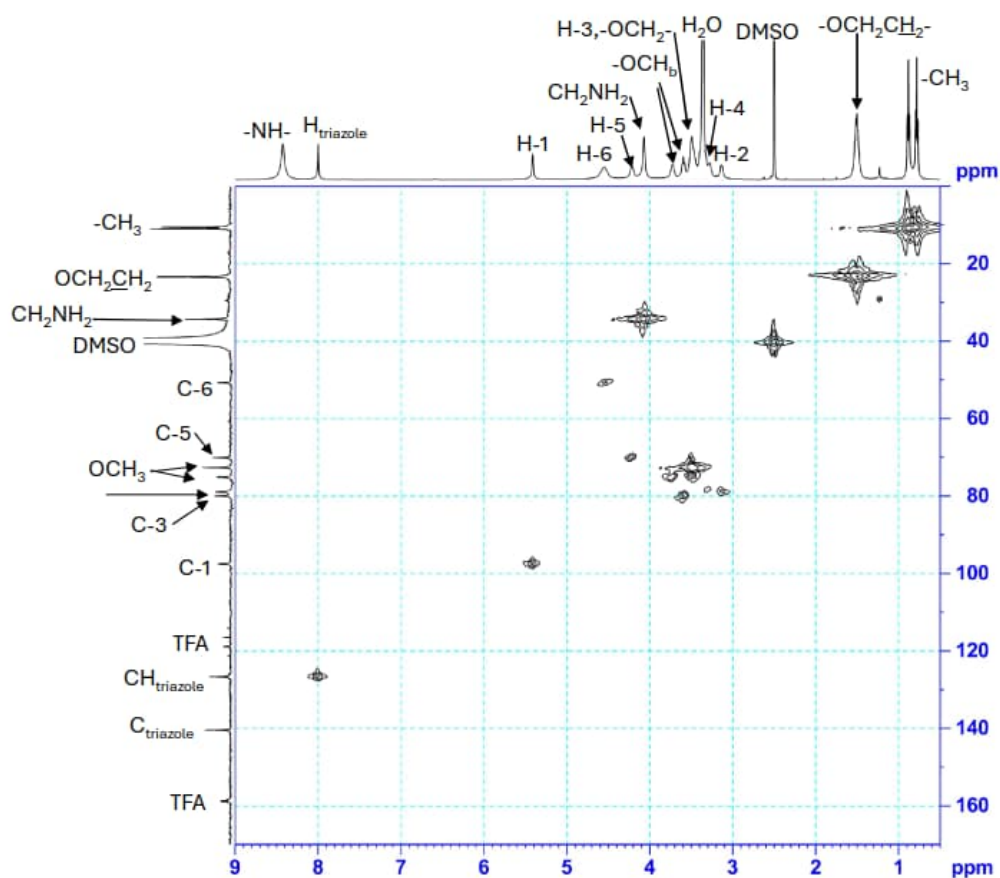

1.20 <sup>1</sup>H NMR (500 MHz, DMSO-*d*<sub>6</sub>) spectrum of aminoclick butyl ether **7**.

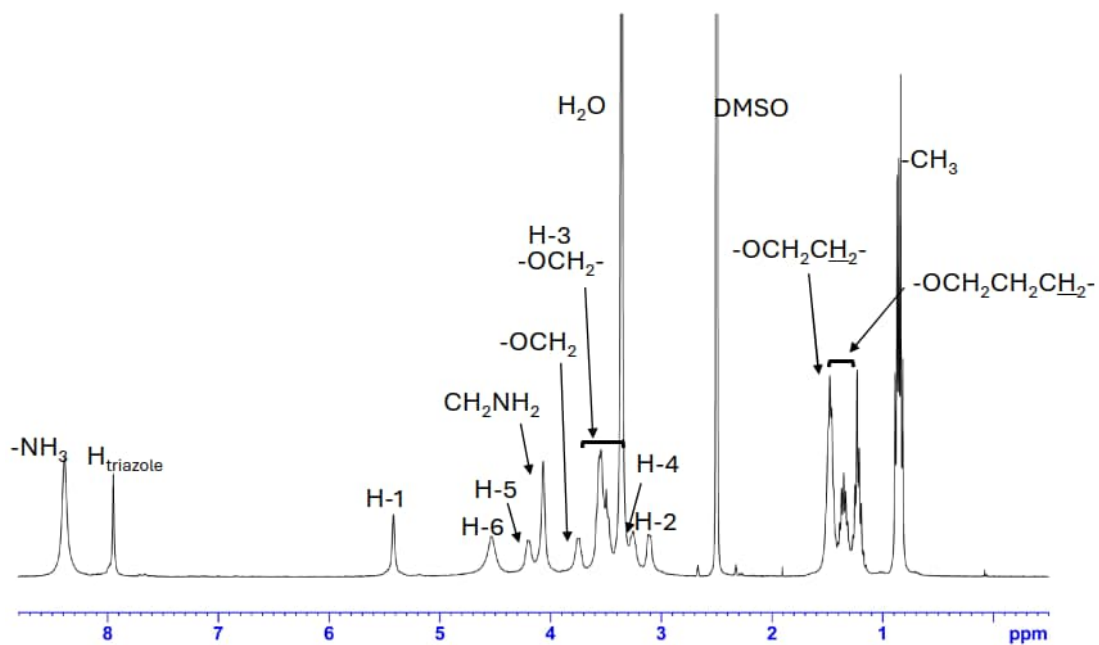

1.21 COSY (500 MHz, DMSO-*d*<sub>6</sub>) spectrum of aminoclick butyl ether **7**.

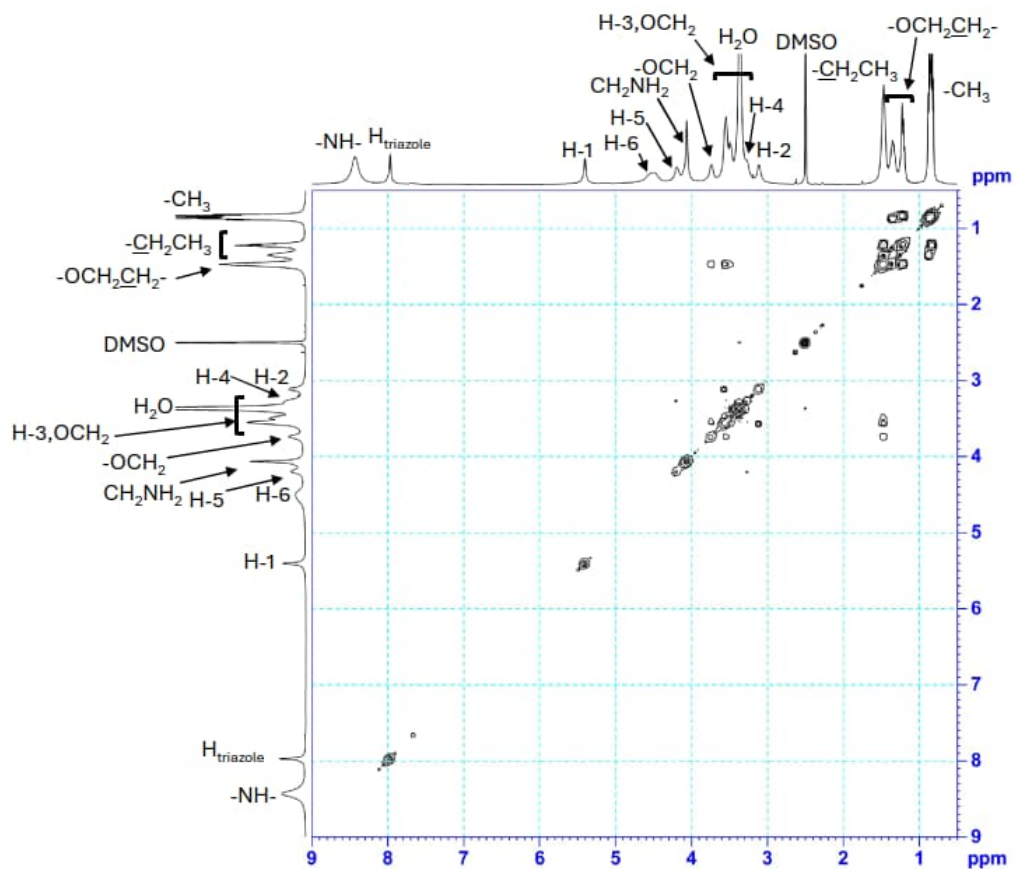

1.22 <sup>13</sup>C NMR (125 MHz, DMSO-*d*<sub>6</sub>) spectrum of aminoclick butyl ether **7**.

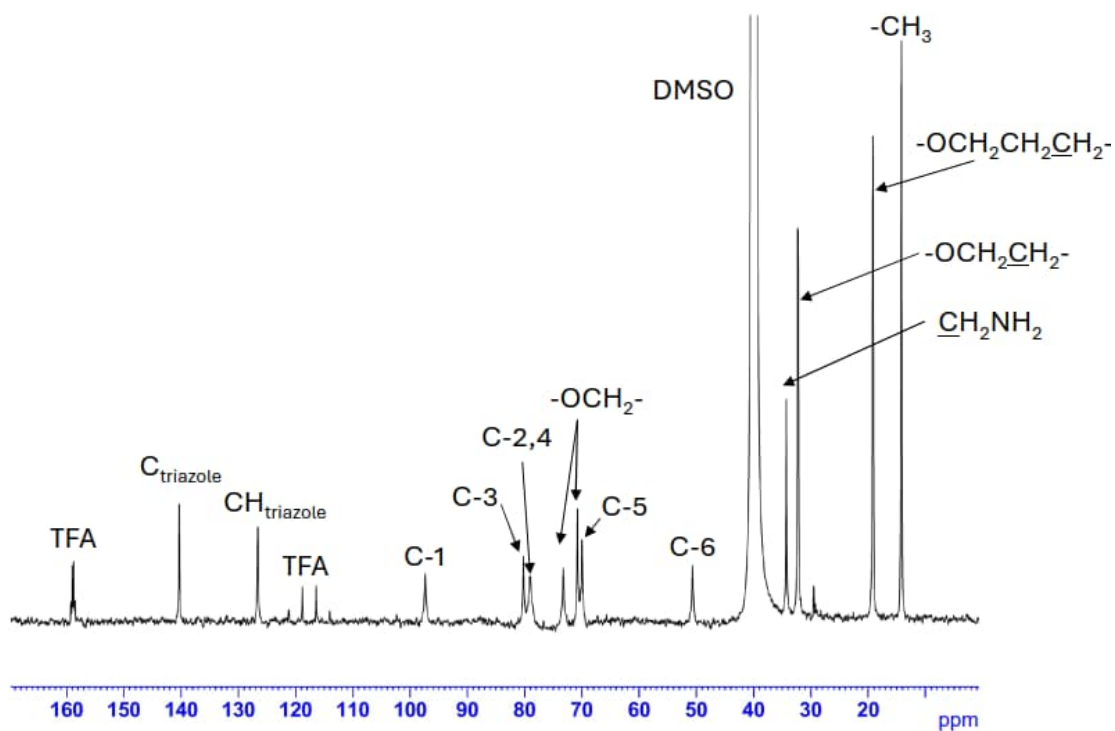

1.23 HMQC (500 MHz, DMSO-*d*<sub>6</sub>) spectrum of aminoclick butyl ether **7**.

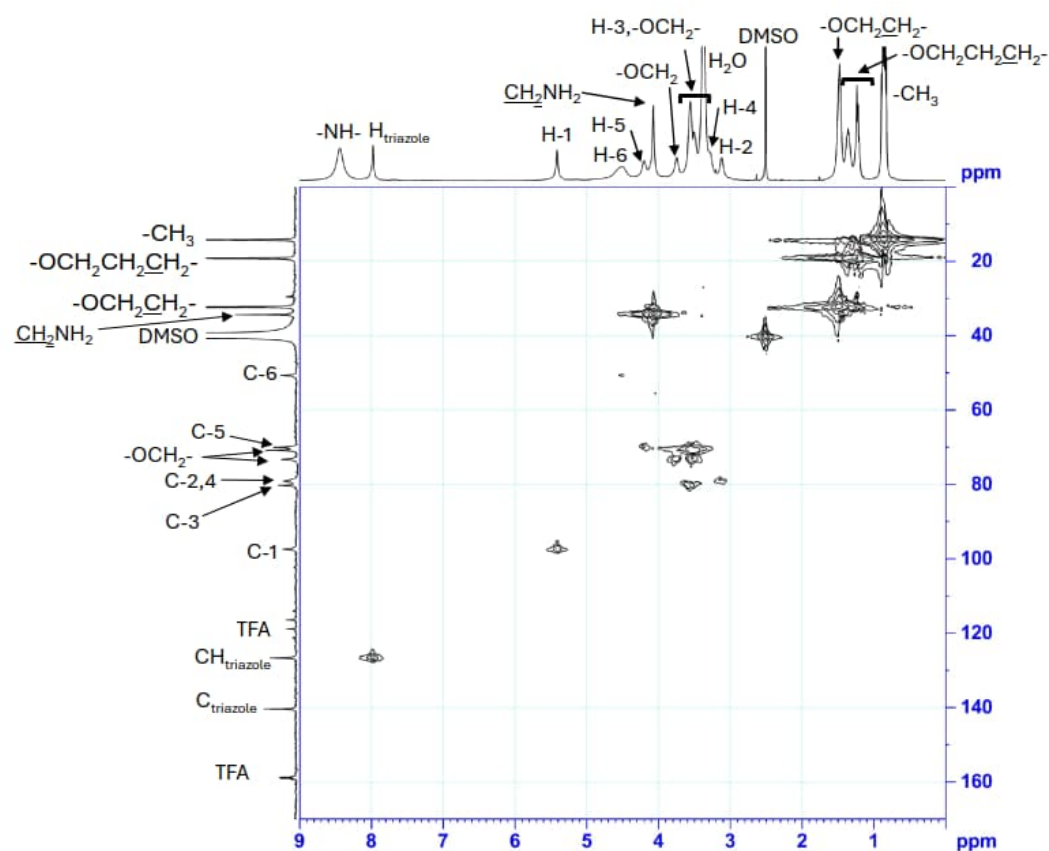

1.24 <sup>1</sup>H NMR (400 MHz, DMSO-*d*<sub>6</sub>) spectrum of amino methyl ether **13**.<sup>1</sup>

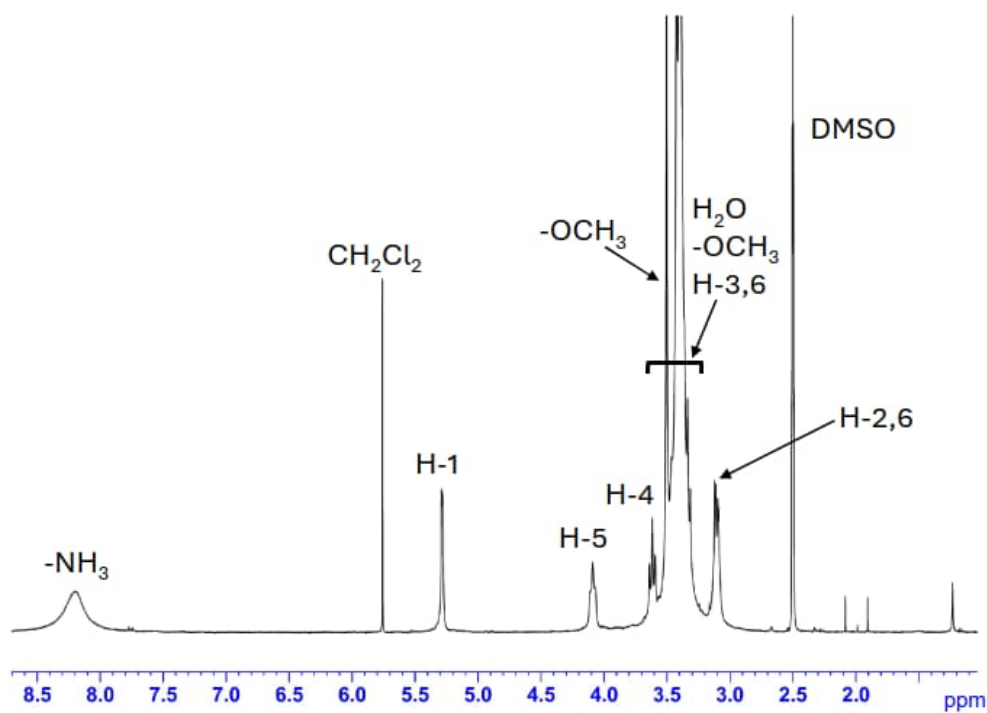

1.25  $^1\text{H}$  NMR (500 MHz,  $\text{DMSO-}d_6$ ) spectrum of amino ethyl ether **14**.

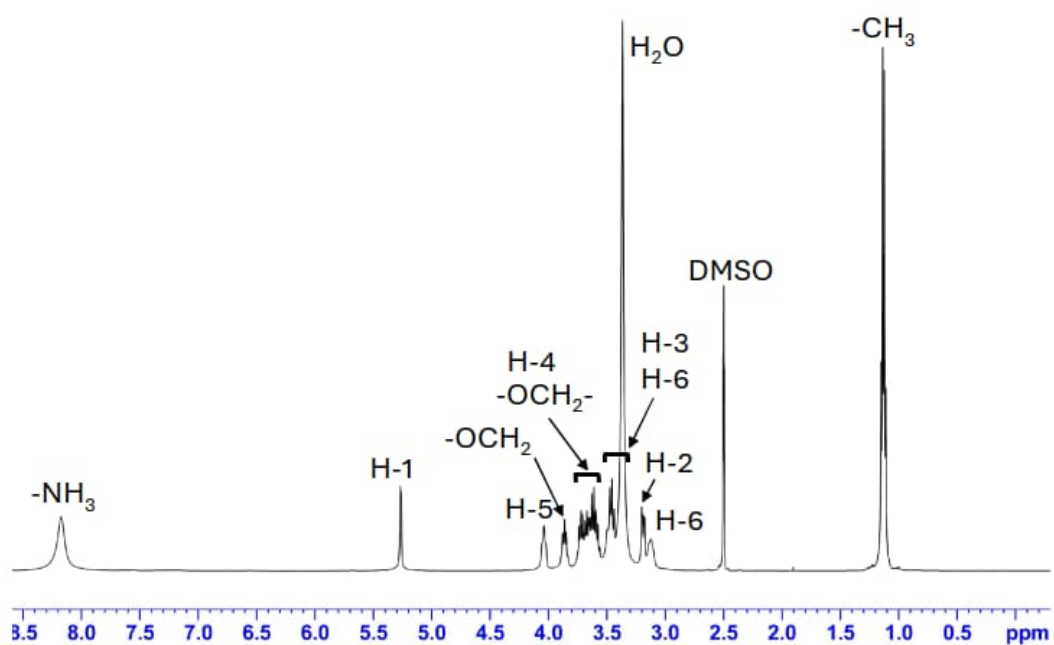

1.26 COSY (500 MHz,  $\text{DMSO-}d_6$ ) spectrum of amino ethyl ether **14**.

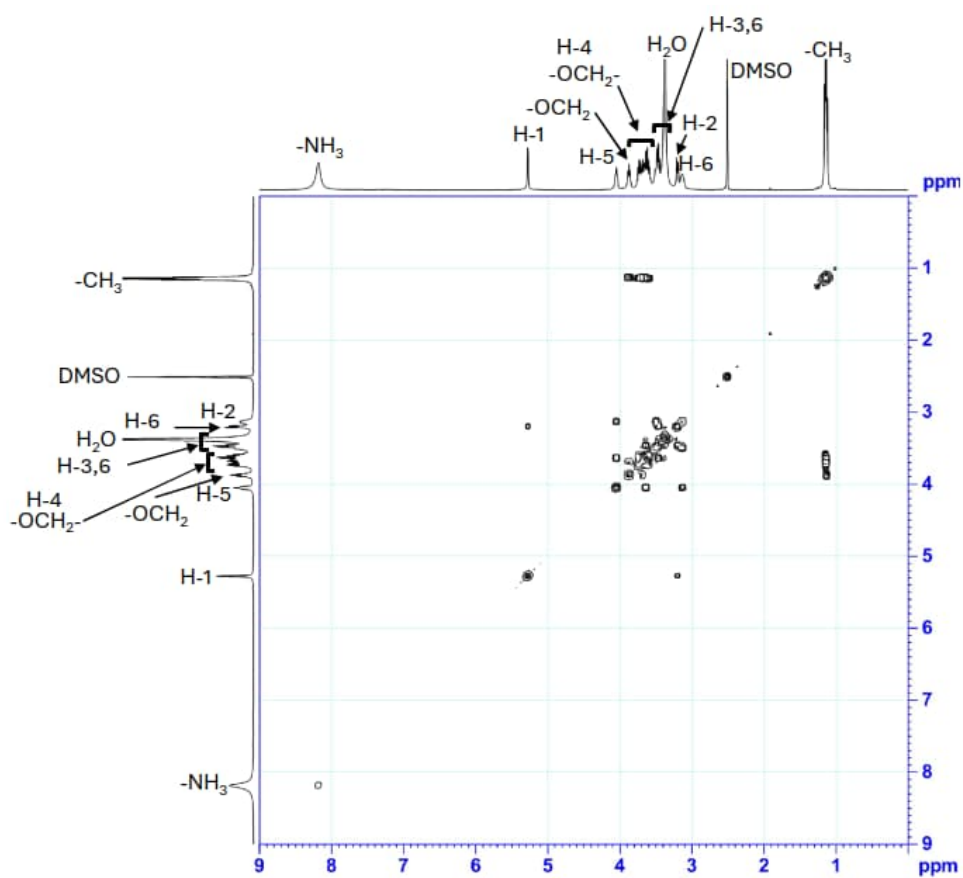

1.27  $^{13}\text{C}$  NMR (125 MHz,  $\text{DMSO-}d_6$ ) spectrum of amino ethyl ether **14**.

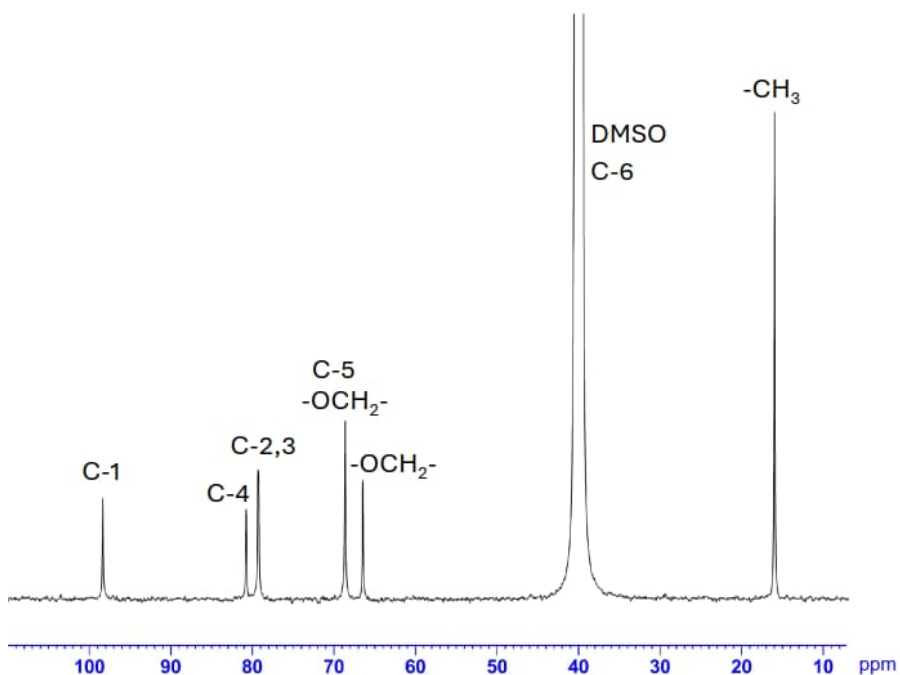

1.28 HMQC (500 MHz,  $\text{DMSO-}d_6$ ) spectrum of amino ethyl ether **14**.

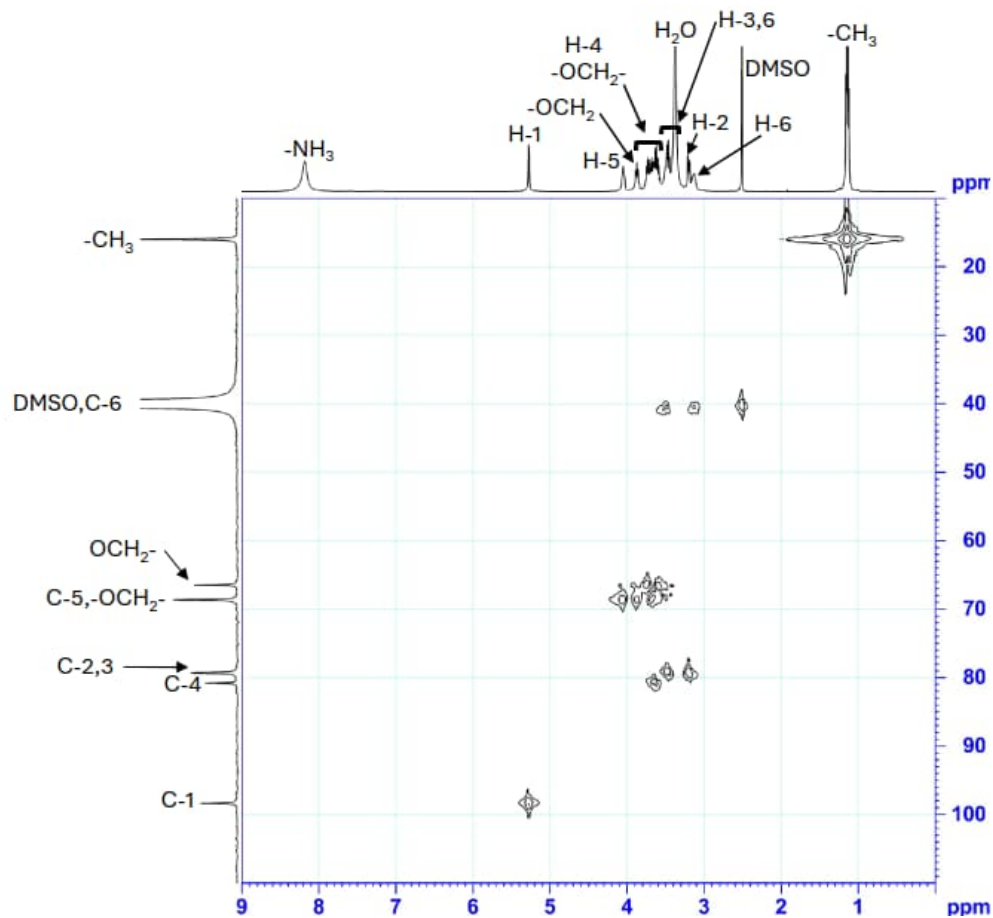



1.29  $^1\text{H}$  NMR (500 MHz,  $\text{DMSO-}d_6$ ) spectrum of amino propyl ether **15**.

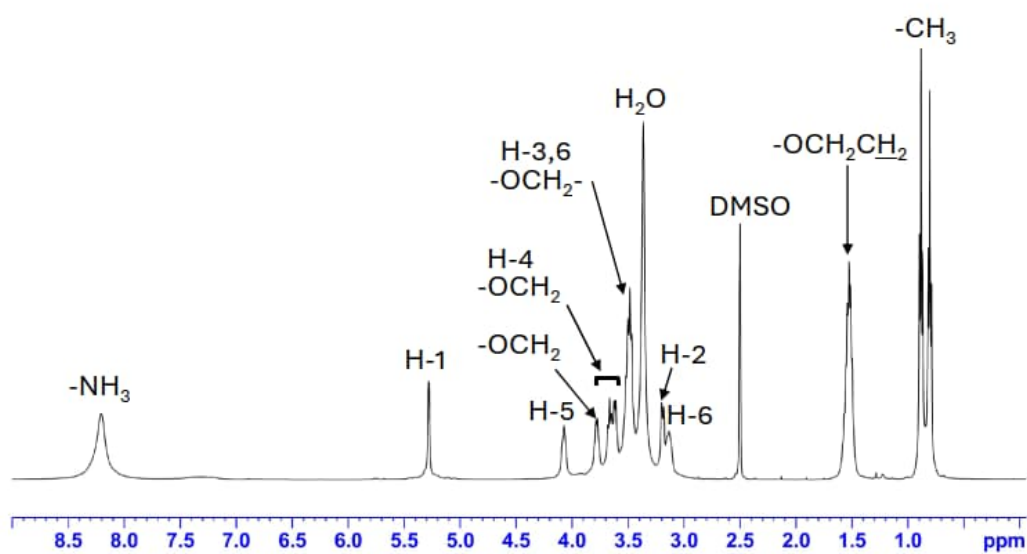

1.30 COSY (500 MHz,  $\text{DMSO-}d_6$ ) spectrum of amino propyl ether **15**.

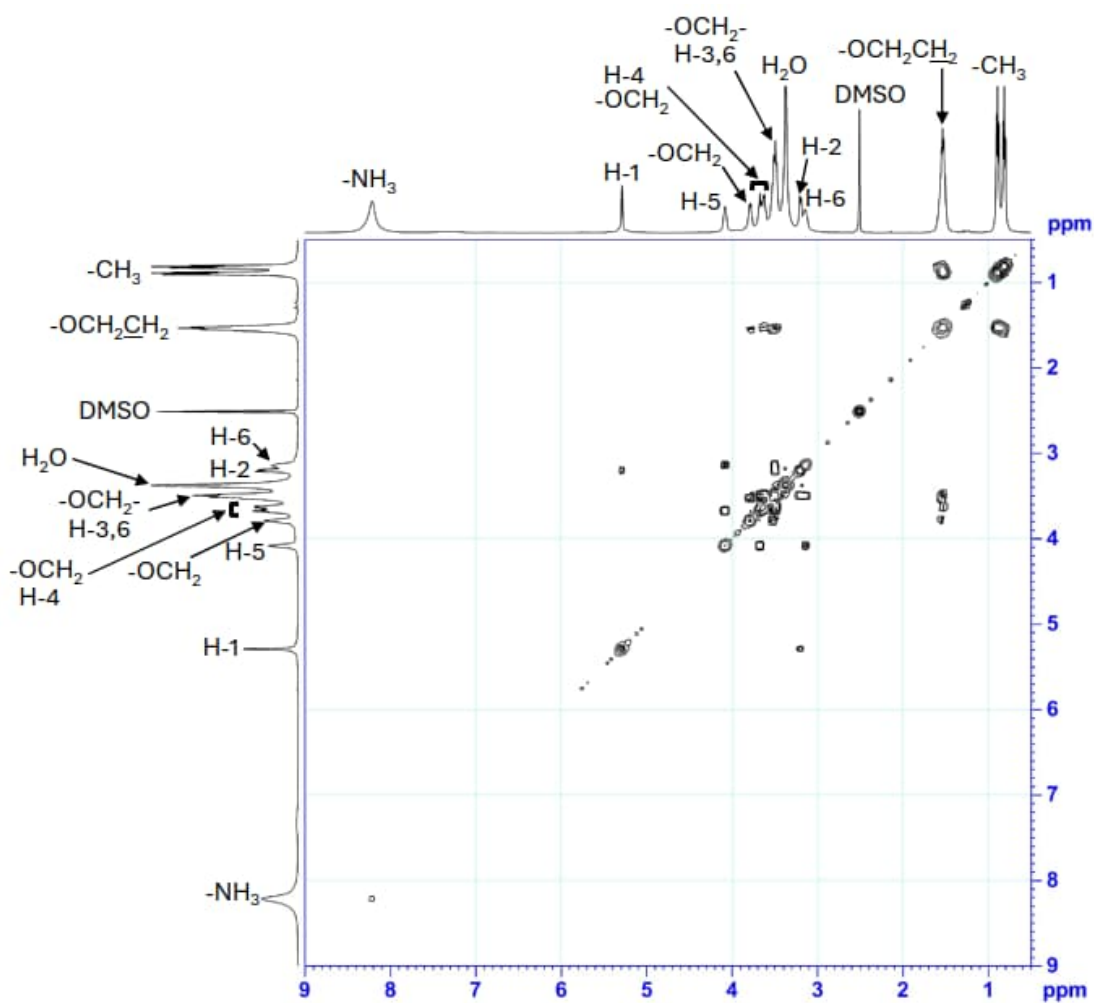



1.31  $^{13}\text{C}$  NMR (125 MHz,  $\text{DMSO-}d_6$ ) spectrum of amino propyl ether **15**.

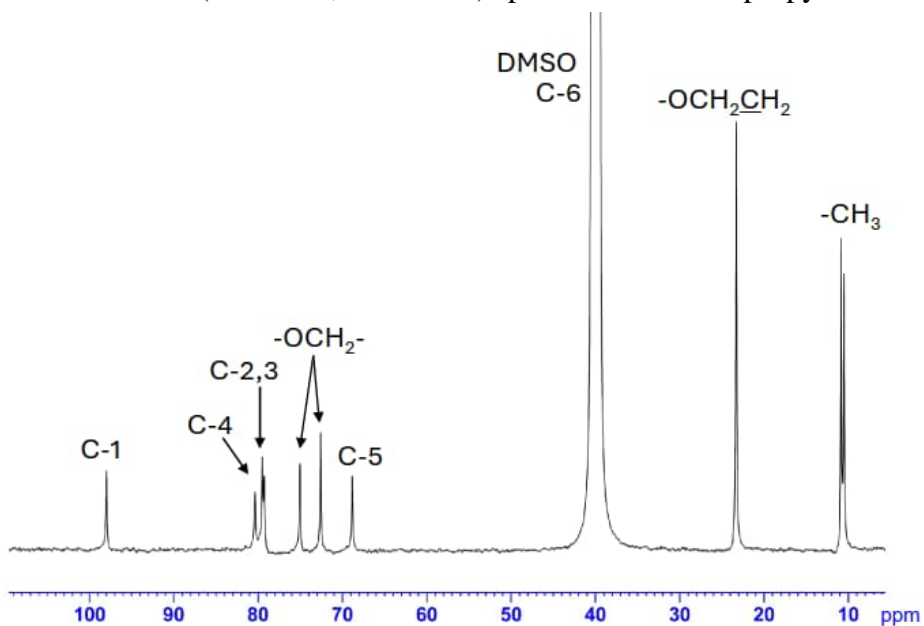

1.32 HMQC (500 MHz,  $\text{DMSO-}d_6$ ) spectrum of amino propyl ether **15**.

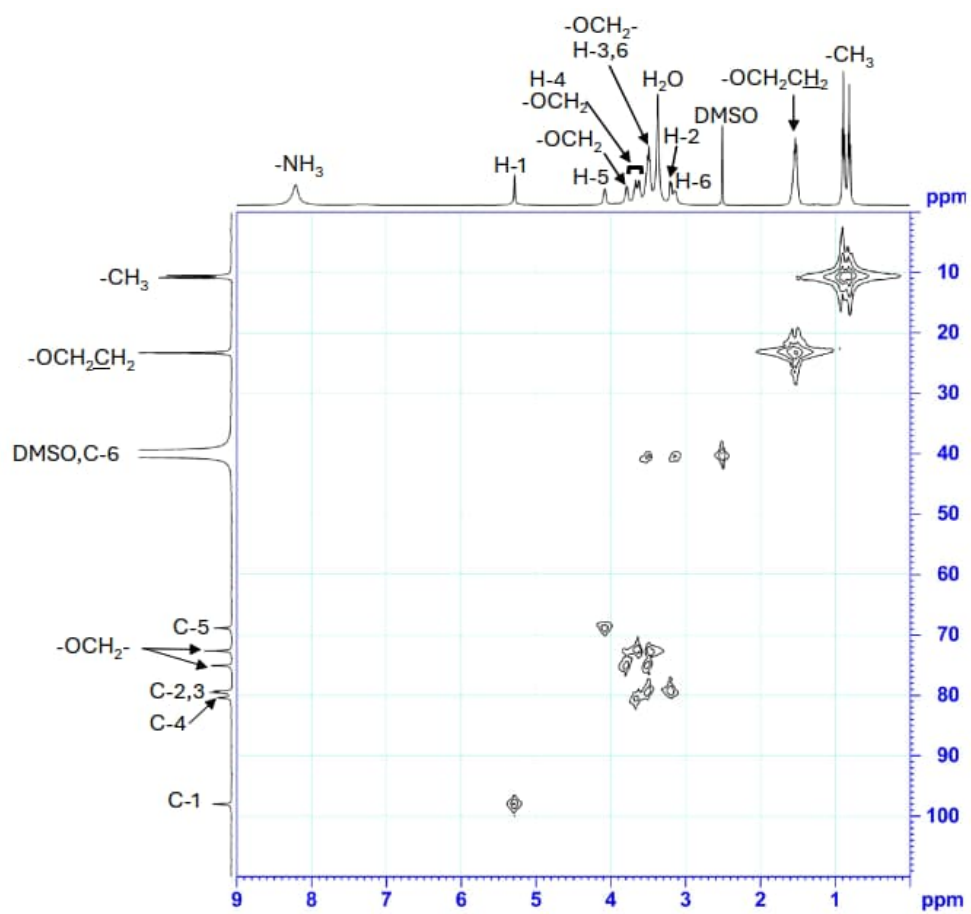

## 2. References

- 1 . D. A. Fulton, A. R. Pease and J. F. Stoddart, *Israel J. Chem.*, 2000, **40**, 32.
